# Supplementary material
Source: publisher figshare collection journal article supplement (https://acs.figshare.com/ndownloader/files/5129011)
Supplement: Supplementary file 1 [file 5129011]

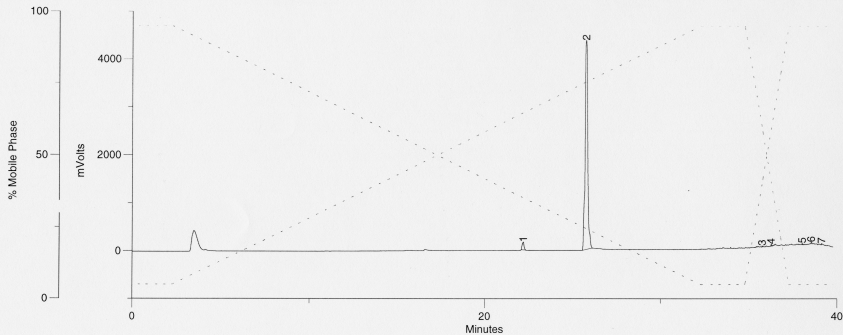

— > d:\gilsonhplumarray\lc\cyanine.gdt : sedex : Cy3 Dyes: Inj. Number: 1  
- - - aqueous  
- - - organic

| Inj. Number | Peak Name | R. Time | Area  | Area %     | Sample Descrip. |          |  |  |  |  |  |  |  |  |
|-------------|-----------|---------|-------|------------|-----------------|----------|--|--|--|--|--|--|--|--|
| 1           | 1.00      | 1       | 22.20 | 210870.48  | 2.62            | Cy3 Dyes |  |  |  |  |  |  |  |  |
| 2           | 1.00      | 2       | 25.76 | 7787041.50 | 96.58           | Cy3 Dyes |  |  |  |  |  |  |  |  |
| 3           | 1.00      | 3       | 35.76 | 7609.73    | 0.094           | Cy3 Dyes |  |  |  |  |  |  |  |  |
| 4           | 1.00      | 4       | 36.28 | 20572.91   | 0.26            | Cy3 Dyes |  |  |  |  |  |  |  |  |
| 5           | 1.00      | 5       | 38.04 | 15663.26   | 0.19            | Cy3 Dyes |  |  |  |  |  |  |  |  |
| 6           | 1.00      | 6       | 38.55 | 16574.46   | 0.21            | Cy3 Dyes |  |  |  |  |  |  |  |  |
| 7           | 1.00      | 7       | 39.12 | 4576.38    | 0.057           | Cy3 Dyes |  |  |  |  |  |  |  |  |
